# Supplementary material for: Costs and Benefits of Transgenerational Induced Resistance in Arabidopsis
Source: PubMed Central journal article supplement (PMC7952753; doi:10.3389/fpls.2021.644999), 2021-02-26
Supplement: Data_Sheet_3.pdf [file Data_Sheet_3.pdf]

## Supplementary Tables

**Table S1.** Collection of Arabidopsis F1 and F2 populations (Col-0) that in the parental generation had been subjected to varying stress intensities by *Pst*, *Pc* or soil salinity.

| Parental treatment          | Generation | No. of lines | Code                     |
|-----------------------------|------------|--------------|--------------------------|
| <i>Pst</i> -Mock            | F1         | 4 lines      | <i>Pst</i> -0, 1-4       |
| <i>Pst</i> -Low             | F1         | 4 lines      | <i>Pst</i> -I, 1-4       |
| <i>Pst</i> -Medium          | F1         | 4 lines      | <i>Pst</i> -II, 1-4      |
| <i>Pst</i> -High            | F1         | 4 lines      | <i>Pst</i> -III, 1-4     |
| <i>Pst</i> -Mock            | F2         | 12 lines     | <i>Pst</i> -0 M2, 1-12   |
| <i>Pst</i> -Low             | F2         | 12 lines     | <i>Pst</i> -I M2, 1-12   |
| <i>Pst</i> -Medium          | F2         | 12 lines     | <i>Pst</i> -II M2, 1-12  |
| <i>Pst</i> -High            | F2         | 12 lines     | <i>Pst</i> -III M2, 1-12 |
| F1 <i>Pc</i> -Mock          | F1         | 4 lines      | <i>Pc</i> -0, 1-4        |
| F1 <i>Pc</i> -Low           | F1         | 4 lines      | <i>Pc</i> -I, 1-4        |
| F1 <i>Pc</i> -Medium        | F1         | 4 lines      | <i>Pc</i> -II, 1-4       |
| F1 <i>Pc</i> -High          | F1         | 4 lines      | <i>Pc</i> -III, 1-4      |
| F2 <i>Pc</i> -Mock          | F2         | 12 lines     | <i>Pc</i> -0 M2, 1-12    |
| F2 <i>Pc</i> -Low           | F2         | 12 lines     | <i>Pc</i> -I M2, 1-12    |
| F2 <i>Pc</i> -Medium        | F2         | 12 lines     | <i>Pc</i> -II M2, 1-12   |
| F2 <i>Pc</i> -High          | F2         | 12 lines     | <i>Pc</i> -III M2, 1-12  |
| F1 Salt-Mock                | F1         | 4 lines      | S-0, 1-4                 |
| F1 Salt-Low                 | F1         | 4 lines      | S-I, 1-4                 |
| F1 Salt-Medium <sup>1</sup> | F1         | 4 lines      | S-II, 1-4                |
| F1 Salt-High <sup>1</sup>   | F1         | 4 lines      | S-III, 1-4               |
| F2 Salt-Mock                | F2         | 12 lines     | S-0 M2, 1-12             |
| F2 Salt-Low                 | F2         | 12 lines     | S-I M2, 1-12             |
| F2 Salt-Medium              | F2         | 12 lines     | S-II M2, 1-12            |
| F2 S-High                   | F2         | 8 lines      | S-III M2, 1-12           |

<sup>1</sup> poor germination and only ~50-100 seeds left.

**Table S2.** Number of independent t-IR experiments with similar results in matched environments.

| <b>Parental Stress</b> | <b>F1 Progeny</b>                | <b>F2 Progeny</b> |
|------------------------|----------------------------------|-------------------|
| <i>Pst</i>             | 3 (1 <i>Pst</i> , 2 <i>Hpa</i> ) | 2                 |
| <i>Pc</i>              | 4*                               | 3*                |
| Salt                   | 3                                | 1                 |

\*3 and 2 repeats in F1 and F2 progeny, respectively, were only tested in response to the highest stress level.

**Table S3.** Number of independent t-IR experiments with similar results in mismatched environments.

| <b>Parental Stress</b> | <b>Challenge in F1 progeny</b> |                  |             |
|------------------------|--------------------------------|------------------|-------------|
|                        | <b><i>Hpa</i></b>              | <b><i>Pc</i></b> | <b>Salt</b> |
| <i>Pst</i>             | -                              | 1                | 1           |
| <i>Pc</i>              | 3                              | -                | 1           |
| Salt                   | 2                              | 2                | -           |
